# Supplementary material
Source: Springer Nature journal article supplement (https://www.springermedizin.de/resource/supplementary/12865_2013_560_MOESM6_ESM.docx/9428272)
Supplement: MOESM6 [file 9428272]

| 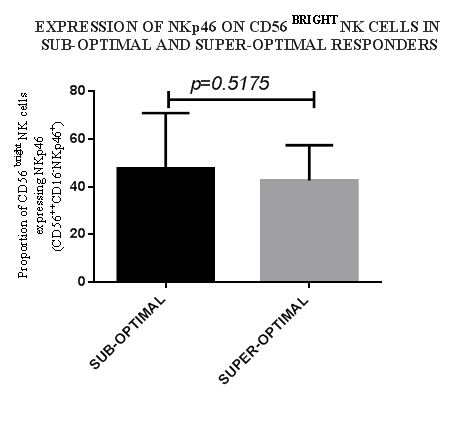 | 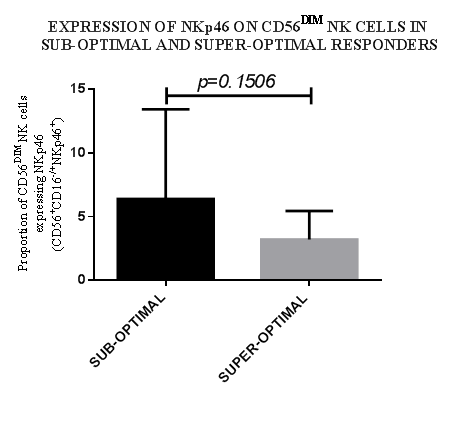 |
| --- | --- |
| 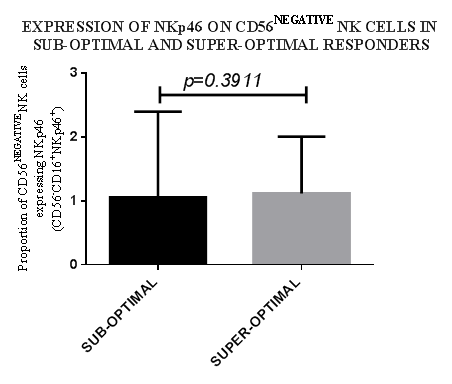 | |

**Figure 7: Differences in expression of NKp46 on the NK subsets found in sub-optimal and super-optimal responders. Panel A shows comparable** NKp46 expression in CD56 BRIGHT(CD56++CD16-NKp46+), p=0.518, Panel B shows higher NKp46 expression in CD56 DIM(CD56+CD16+/-NKp46+) among suboptimal responders relative to optimal responders although the difference is not statistically significant (P=0.151) and Panel C shows **B** and CD56 NEGATIVE(CD56-CD16+NKp46+) among sub-optimal and super-optimal responders; P=0.391.
